# Supplementary material for: Meiotic Chromosome Synapsis and XY-Body Formation In Vitro
Source: PubMed Central journal article supplement (PMC8551552; doi:10.3389/fendo.2021.761249), 2021-10-14
Supplement: Image_1.pdf [file Image_1.pdf]

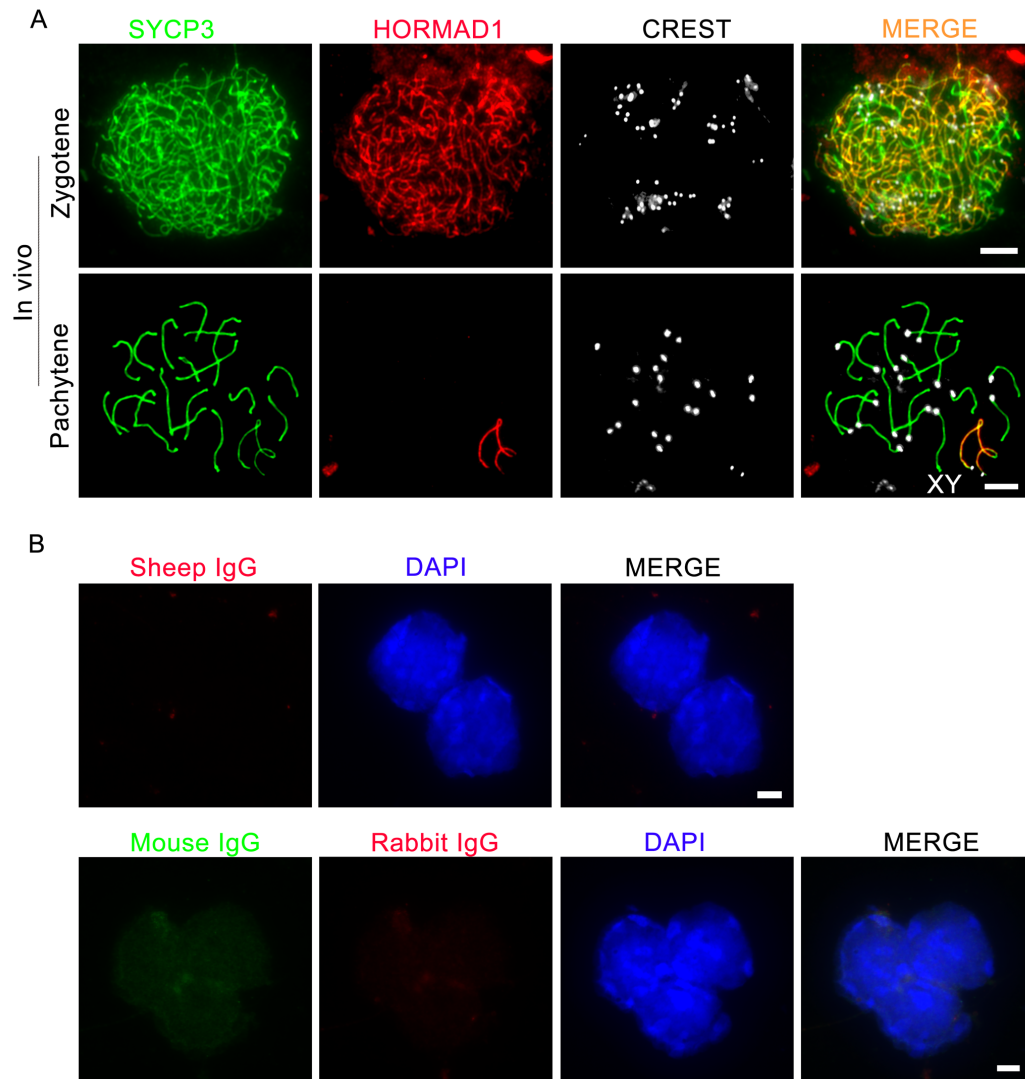

**Figure S1. Positive and negative control experiments using mouse testicular cells.**

(A) *In vivo* spermatocytes stained for SYCP3 (green), HORMAD1 (red) and centromeres (CREST, white).

(B) Primary antibodies replaced with mouse, rabbit and sheep IgGs as negative controls (B). Scale bars, 5 $\mu$ m.
