# Supplementary material for: Meiotic Chromosome Synapsis and XY-Body Formation In Vitro
Source: PubMed Central journal article supplement (PMC8551552; doi:10.3389/fendo.2021.761249), 2021-10-14
Supplement: Image_2.pdf [file Image_2.pdf]

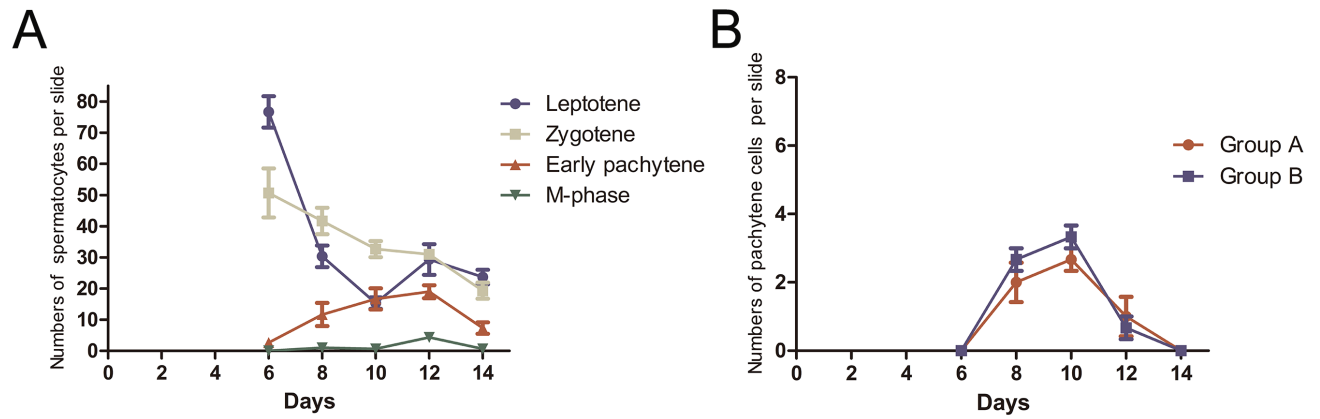

**Figure S2. Quantification of *in vitro*- generated spermatocytes.**

(A). Quantification of leptotene, zygotene, early pachytene and meiotic m-phase spermatocytes per microscopy slide for each time point. Data are presented as the mean  $\pm$  SEM, n=3.

(B). Quantification of pachytene spermatocytes in Group A and Group B per microscopy slide for each time point. Data are presented as the mean  $\pm$  SEM, n=3.
