# Supplementary material for: Meiotic Chromosome Synapsis and XY-Body Formation In Vitro
Source: PubMed Central journal article supplement (PMC8551552; doi:10.3389/fendo.2021.761249), 2021-10-14
Supplement: Table_1.pdf [file Table_1.pdf]

| <b>Chemicals/media</b> | <b>Firm</b> | <b>Cat number</b> | <b>Concentration</b>  |
|------------------------|-------------|-------------------|-----------------------|
| Bovine Albumine        | Roche       | 10735094001       | 5 mg/ml               |
| D(+) Glucose           | Sigma       | G7021             | 6 mg/ml               |
| Ascorbic acid          | Sigma       | A4544             | 1x 10 <sup>-4</sup> M |
| Transferrin            | Sigma       | T1147             | 100 µg/ml             |
| Pyruvic acid           | Sigma       | P2256             | 30 mg/ml              |
| d-Biotin               | Sigma       | B4501             | 10 µg/ml              |
| 2-beta Mercaptoethanol | Sigma       | M7522             | 5x 10 <sup>-5</sup> M |
| DL-lactic acid         | Sigma       | L4263             | 1 µl/ml               |
| MEM-non essential aa   | Invitrogen  | 11140-035         | 10 µl/ml              |
| Stem Pro Supplement    | Invitrogen  | 10639-011         | 26 µl/ml              |
| Human Insulin          | Sigma       | I9278             | 25 µg/ml              |
| Sodium Selenite        | Sigma       | S2651             | 30 nM                 |
| Putrescine             | Sigma       | P7505             | 60 µM                 |
| L-Glutamine            | Invitrogen  | 25030-024         | 2 mM                  |
| MEM Vitamine solution  | Invitrogen  | 11120-037         | 10 µl/ml              |
| b-Estradiol            | Sigma       | E2758             | 30 ng/ml              |
| Progesterone           | Sigma       | P8783             | 60 ng/ml              |
| Pen/Strep              | Invitrogen  | 15140122          | 0,5%                  |

**Supplementary Table 1: Other Components of Stempro basic medium**
