# Supplementary material for: Meiotic Chromosome Synapsis and XY-Body Formation In Vitro
Source: PubMed Central journal article supplement (PMC8551552; doi:10.3389/fendo.2021.761249), 2021-10-14
Supplement: Table_2.pdf [file Table_2.pdf]

| Primary antibodies   |                    |                           |             |              |
|----------------------|--------------------|---------------------------|-------------|--------------|
| Target Protein       | Host               | Source                    | Cat. Number | IHC Dilution |
| $\gamma$ -H2AX       | Mouse              | Merck Millipore           | 05-636      | 1:10,000     |
| SYCP3                | Mouse              | Abcam                     | ab97672     | 1:600        |
| SYCP3                | Rabbit             | NOVUS                     | NB300-231   | 1:2500       |
| CREST-serum          | Human              | FitzGerald                | 90C-CS1058  | 1:600        |
| ATR                  | Rabbit             | Cell Signaling Technology | #2790       | 1:100        |
| RAD51                | Rabbit             | Thermo Fisher Scientific  | PA5-27195   | 1:200        |
| MLH1                 | Mouse              | BD Pharmingen             | 550838      | 1:50         |
| MDC1                 | Sheep              | Bio-Rad Laboratories      | AHP799      | 1:600        |
| SYCP1                | Rabbit             | Abcam                     | ab15090     | 1:600        |
| HORMAD1              | Rabbit             | Abcam                     | ab155176    | 1:400        |
| Secondary antibodies |                    |                           |             |              |
| Fluorescence         | Host               | Source                    | Cat. Number | IHC Dilution |
| Alexa Fluor 488      | Donkey anti-Mouse  | Thermo Fisher Scientific  | A21202      | 1:1000       |
| Alexa Fluor 488      | Donkey anti-Rabbit | Thermo Fisher Scientific  | A21206      | 1:1000       |
| Alexa Fluor 555      | Goat anti-mouse    | Thermo Fisher Scientific  | A21424      | 1:1000       |
| Alexa Fluor 555      | Donkey anti-Rabbit | Thermo Fisher Scientific  | A31572      | 1:1000       |
| Alexa Fluor 647      | Goat anti-Human    | Thermo Fisher Scientific  | A21445      | 1:1000       |
| Alexa Fluor 647      | Donkey anti-Sheep  | Thermo Fisher Scientific  | A21448      | 1:1000       |

**Supplementary Table 2: Antibodies used in this study.**
